# Supplementary material for: A star-shaped triphenylamine π-conjugated system with internal charge-transfer as donor material for hetero-junction solar cells
Source: Royal Society of Chemistry journal article supplement (doi:10.1039/b516781g), 2006-01-01
Supplement: b516781g.pdf [file b516781g.pdf]

## Supplementary data

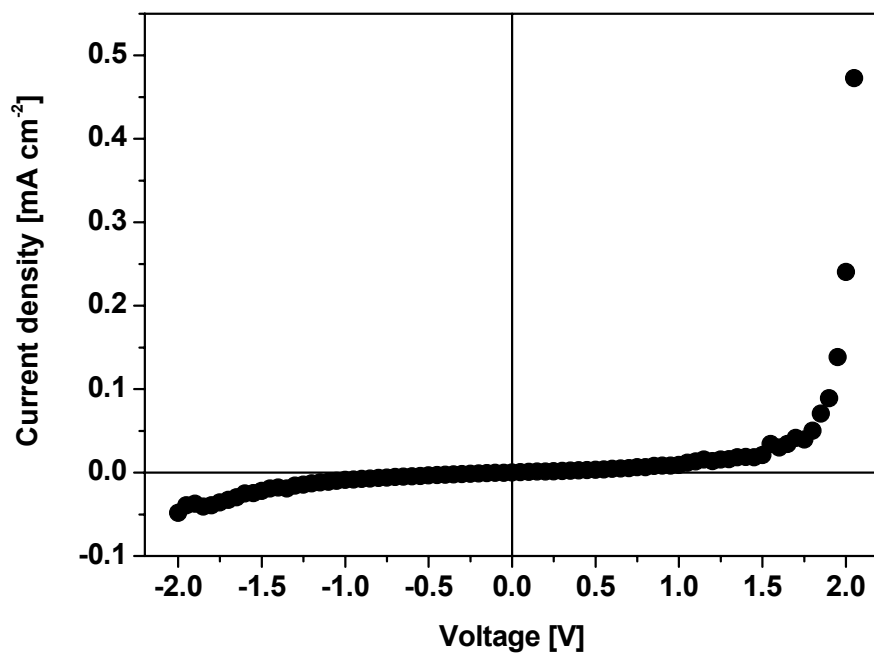

Current voltage curve of the cell ITO/1(25nm)/C<sub>60</sub>(25nm)/Al(60nm)

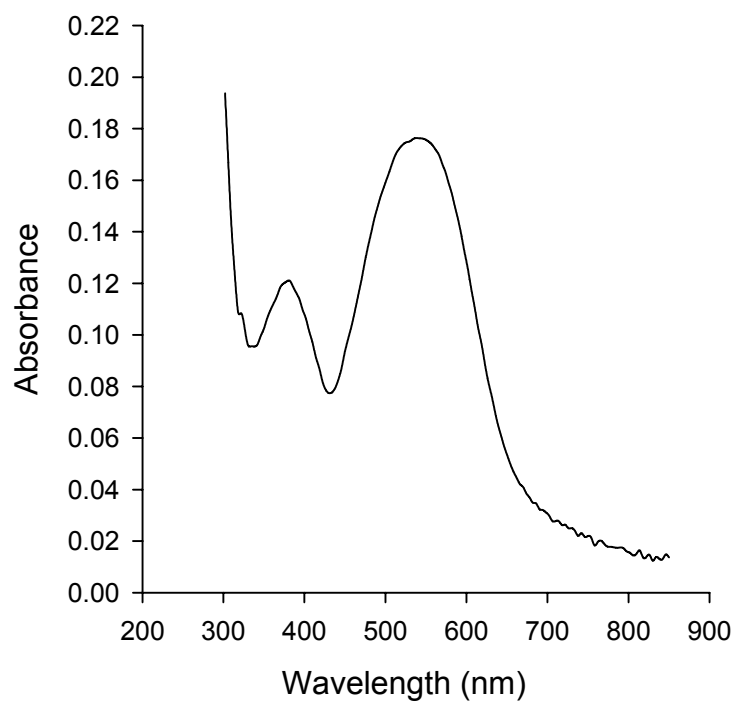

Electronic absorption spectrum of a film of **1** evaporated on glass
